# Supplementary figures and images for: Anti-Neuroinflammatory Effects of Arecae pericarpium on LPS-Stimulated BV2 Cells
Source: MDPI journal article supplement (doi:10.3390/cimb46010056), 2024-01-19

A

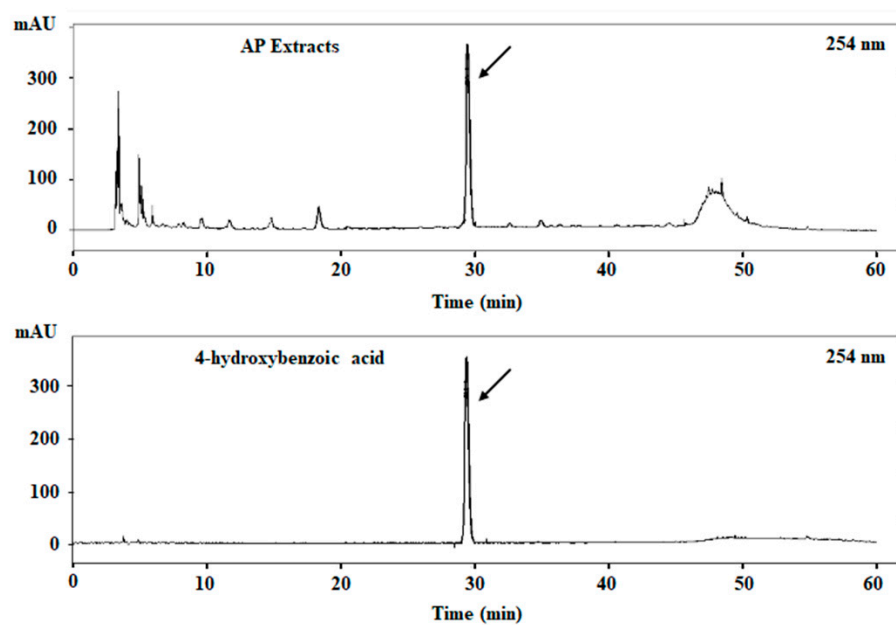

B

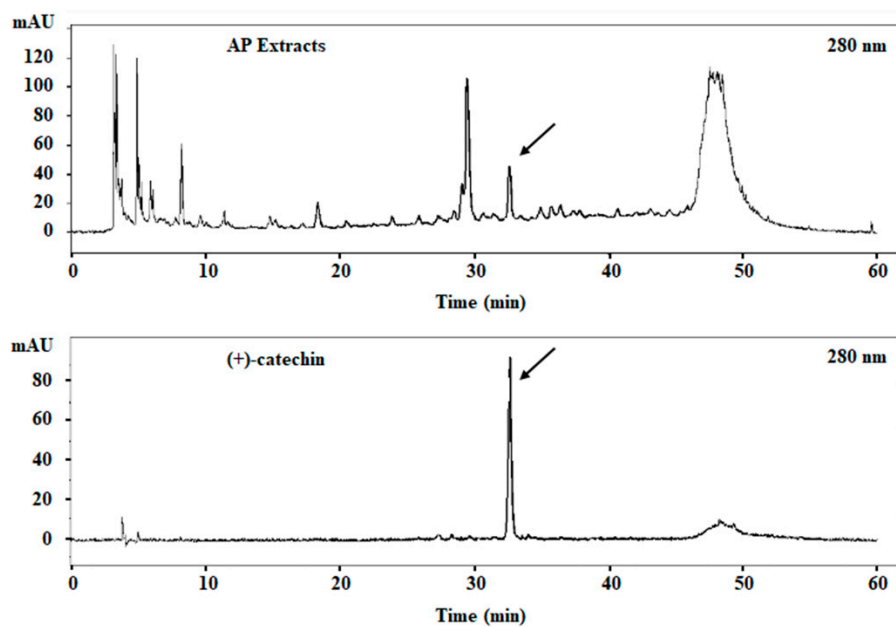

**Figure S1.** HPLC analysis of AP extracts.

Supplement: s1 [file s1]
